# Supplementary material for: Comparative Transcriptome and sRNAome Analyses Reveal the Regulatory Mechanisms of Fruit Ripening in a Spontaneous Early-Ripening Navel Orange Mutant and Its Wild Type
Source: MDPI journal article supplement (doi:10.3390/genes13101706), 2022-09-22
Supplement: s1 [file s1]

Table S10 The primer sequences of target gene for qRT-PCR

| Gene name       | Forward Primer 5'to3'     | Reverse Primer 5'to3'    |
|-----------------|---------------------------|--------------------------|
| orange1.1t02597 | ATTCACATTCCTGCAAGGCG      | CTAGGCGGCATCATTTGGCT     |
| Cs7g10990       | ATTGGGGAATTGTGGCAGCA      | GGCTGGCATTACTAGGCTGA     |
| Cs1g03640       | ACGAGTTGATGACTGGGAGA      | CAATGGCTGCACGGTTTTCA     |
| orange1.1t02265 | GCTGGGACTGGTTTCTCTGG      | TGACGGATTTGGTATGGGCA     |
| Cs7g11770       | GGCAACAAGAAACAACATAGGCT   | CTAATCAGGGGCCTAGCCATT    |
| Cs7g10830       | ATGGCTGAGGTTCTTGACCA      | GGCATGACAGCGTGAGGTAT     |
| Cs8g16440       | TGACGGCCAATTCACTATGC      | GTGAACCGCTGCAAACCTGG     |
| Cs7g25670       | CGTGACTAGCAGCCCCCTTTT     | GCTGAAAGCCCAGTGGAAC      |
| Cs6g11800       | TATCCCCCTTCTCACCACCA      | GAAACCAGCCGGAGACAGAC     |
| Cs3g18940       | ATTCAACAGTGGGGTGCCTG      | CTCAGTGGACACACGTCTCA     |
| Cs6g11860       | GCCACTCTTCCCTTGCTCTG      | GTATCGGCTTGGGGATTGGT     |
| Cs6g07800       | CAGGGAGGCTTTACATTGCC      | GAGAGCAGGACATTGGTGGT     |
| Cs6g07410       | AACCTACACGCTCGAAGTGG      | GGCTTTCAGCAAAACGTCCG     |
| Cs7g23490       | CGCAGCCAAAGACACTTTCA      | TGGGGTGATGAGCACAACCTT    |
| Cs6g07400       | AGACCTCTATCCCTGCTCGG      | TCAGTGTACCCAGCGTCAAC     |
| Cs8g18800       | TTCCGGGGCCAACATACAAT      | GCTTCAACAACAGTGAGCGT     |
| Cs7g31620       | GTTTCAGATGCGCACACCAT      | AGGGCTTAGTGTAGGATGAGTC   |
| Cs7g27790       | GGGCATGGCAAATGCACAAT      | GCGGCAGATGTGTTTTGTGT     |
| Cs6g04120       | GGCAATTTGAAGCCCCTCTTG     | TGATCGACTGGGTGTAACGG     |
| orange1.1t04055 | AGGCCTAAGCAGCAAGAAGC      | GCTGGTGACTGAAGATGGGT     |
| orange1.1t05093 | CGTGGGGTTTCAGATTCAAGC     | TGAATCTCAGAATGCCGGGG     |
| orange1.1t05587 | ACTCTCTCACTCTTACTCTTACGTT | TAGCTCCCAAGGCTCAAAGC     |
| Cs7g22510       | TGGACAGTCTCACAGGCATTG     | GTTGTTGTTGTCCTGACCGTTT   |
| Cs7g22540       | AGTCTCGTGGGGTTCAGATTCT    | TGTTCTCTATTTACCCGTCTACTC |
| Cs2g08080       | ATCCCAGTAACAGCCACCCA      | GGGTGGTGCAGTACCGATT      |
| Cs3g06390       | GGGTAGCCACACCCCTTTCAA     | GTCAAGTGTCACAGTCGGTG     |
| Cs8g16870       | CCCGCTACCAGCTTCATTGAT     | AGTAACCTGAACCTGCGGC      |
| Cs2g15820       | CAGAAACGAGAGGGACTGGC      | GCCTGTTACTGTGCTGGTGA     |
| orange1.1t03355 | AAGATGGCGGAGTTGGTGT       | ACTAATGCCTCTGGGCACAC     |
| Cs1g19320       | CTGCTGCTGTGGAGACGAAA      | GCTGCTTGAAGGTGGAGAATG    |
| ACTB            | CCAATTCTCTCTTGAACCTGTCCTT | TGACTGATGAGAACTGCCAGAAG  |
