# Supplementary material for: Comparative Transcriptome and sRNAome Analyses Reveal the Regulatory Mechanisms of Fruit Ripening in a Spontaneous Early-Ripening Navel Orange Mutant and Its Wild Type
Source: MDPI journal article supplement (doi:10.3390/genes13101706), 2022-09-22
Supplement: s1 [file s1]

Table S4 Family analysis of miRNAs

| miRNA Family | Detected known and novel miRNAs |             |             |             |             |
|--------------|---------------------------------|-------------|-------------|-------------|-------------|
| miR159       | novel_106                       | novel_68    | novel_118   | csi-miR159  |             |
| miR166       | csi-miR166b                     | csi-miR166c | csi-miR166d | csi-miR166e | csi-miR166a |
| miR167_1     | csi-miR167a                     | csi-miR167b | csi-miR167c |             |             |
| miR162_1     | csi-miR162                      |             |             |             |             |
| miR171_1     | csi-miR171a                     |             |             |             |             |
| miR172       | csi-miR172a                     | csi-miR172b | csi-miR172c |             |             |
| miR171_2     | csi-miR171b                     | csi-miR479  |             |             |             |
| miR396       | csi-miR396a                     | csi-miR396b | csi-miR396c |             |             |
| miR397       | csi-miR397                      |             |             |             |             |
| miR399       | csi-miR399a                     | csi-miR399b | csi-miR399c | csi-miR399d | csi-miR399e |
| miR408       | csi-miR408                      |             |             |             |             |
| miR477       | csi-miR477a                     | csi-miR477b | csi-miR477c | csi-miR473  |             |
| miR482       | csi-miR482a                     | csi-miR482b | csi-miR482c | csi-miR472  |             |
| miR530       | csi-miR530a                     | csi-miR530b |             |             |             |
| miR827_3     | csi-miR827                      |             |             |             |             |
