# Supplementary material for: Comparative Transcriptome and sRNAome Analyses Reveal the Regulatory Mechanisms of Fruit Ripening in a Spontaneous Early-Ripening Navel Orange Mutant and Its Wild Type
Source: MDPI journal article supplement (doi:10.3390/genes13101706), 2022-09-22
Supplement: s1 [file s1]

Table S9 qRT-PCR primers for miRNA

| Primers for qRT-PCR | Sequence (5'-3')       |
|---------------------|------------------------|
| csi-miR156f-5p -F   | CGCGGCATGAGAGAGAGAAG   |
| csi-miR160c-5p -F   | CGGCGTTCGTATGTCCCTCG   |
| csi-miR397-5p -F    | GCGGTAGTTGCGACGTGA     |
| csi-miR172a-3p -F   | GCCGGCACGTCGTAGTAGTT   |
| csi-miR3954 -F      | GCGGCACTGGCACTAAAGAG   |
| miRN106 -F          | CGGCTCCTCGAGGGAAGTC    |
| miRN127 -F          | GCGGCATATAACTTCAAATTCG |
| miRN54 -F           | GCTCCCATTTGCCTGTCTGT   |
| common -R           | ACTGCAGGGTCCGAGGTATT   |
| U6-F                | CTCGCTTCGGCAGCACA      |
| U6-R                | AACGCTTCACGAATTTGCGT   |
