# Supplementary material for: Comparative Transcriptome and sRNAome Analyses Reveal the Regulatory Mechanisms of Fruit Ripening in a Spontaneous Early-Ripening Navel Orange Mutant and Its Wild Type
Source: MDPI journal article supplement (doi:10.3390/genes13101706), 2022-09-22
Supplement: s1 [file s1]

Table S8 The primer sequences of Key gene for qRT-PCR

| Gene name       | Forward Primer 5'to3'  | Reverse Primer 5'to3'    |
|-----------------|------------------------|--------------------------|
| Cs5g33420       | GGCGGGTGTTTACGAGGAAT   | CACGGCAAAAGTCGCAGAAT     |
| Cs2g17070       | ATAAAAGGAACGGTGGCCGA   | AGCCACACCCTCTGAAATGG     |
| orange1.1t02530 | GTGCACTGCTGTACCGCTT    | CCATCAGCGTTGGTACAGGA     |
| orange1.1t02529 | GACAGGCTTCGGGGGTAAA    | CCGATCCATCAGCGTTGGTA     |
| Cs6g14340       | TGGATCAAGCCCGACAACAA   | TCCAGTGTCCGTCATTGCTC     |
| Cs5g19060       | TGGGCAGGGTAGGGTTCATA   | TTCTCCCCTGGCCATCTGTA     |
| Cs2g10900       | TAGCTGCAACAGCCAGGAAA   | ACACAATCACACCCTTGCCA     |
| orange1.1t02108 | GTAAGCCCTGCTGCTCTTGA   | TCACCGGAACGCTCATTAGG     |
| Cs5g14370       | TTGGACAAGAATGCCACCGA   | GTCGGCAGGAGTCATACAGG     |
| Cs9g11260       | AGCATCAAGACCCAGTTCGG   | GTCACCTCACCAGTTCCAG      |
| Cs2g03270       | TGCATGACACCTGCTGACTC   | GCTGTTGCGATTACCATCC      |
| orange1.1t00416 | ACGGGTGGAAGGCATTTGAT   | TTGCCACGGCCTGTCTAAAT     |
| Cs2g02500       | CCATACTGATGCTGGTGGCA   | ACGCGATGTAGCACACTCTT     |
| Cs5g29870       | GA CTCAGAGGAAACGCTGCT  | ATGTCTTGCCCGATGATCCC     |
| Cs9g10650       | GCATGGGATTAGGGTTTGGC   | AGCATCCCTCCTCGGTGTTA     |
| orange1.1t03771 | AGGGACCCAACGAGCGA      | TTGACTTCACAGTAATAACAGCCG |
| Cs1g23060       | CTCCGGTAACTTCGGTGTGG   | CCCACCGGATGCATATTCCA     |
| Cs8g02900       | ACATCATCCCTGCTCTTGCC   | ATCGTGTACGTCCCTACCCA     |
| Cs5g17900       | AGGGGCAGATAGGGTGGATT   | TCGCAGCAACTTCTTCTCCC     |
| orange1.1t00550 | AGAGGCGTGAGAAGCTGAAC   | CACGGATGTGGTGGTGCTAT     |
| Cs7g16980       | AGGAGGACAAACATCACGG    | TGGCAACCCAATCTCAAGC      |
| Cs6g10710       | CTGCCGTCCGTCATCTT      | TCTCCATCGCCTCTTCC        |
| Cs4g06710       | TGTGAATAGCCTCGGTCTC    | TATGTGCTGTTCTTTGGGT      |
| Cs5g09220       | GCAATCCGCCACTTTCC      | TATCCTGCCGACCCATCT       |
| Cs7g05690       | TAGGCTTGCGTGGATTG      | ATAACGGAGATGTGGATGGG     |
| orange1.1t03668 | TTCCCGCTCCAATCTCC      | CCCAGTGA ACTTGGCAGAT     |
| Cs5g26080       | TAATACTTGTGGACCAGAGCCT | TGAACCCTTCTGCCAACCTC     |
| Cs3g11040       | TCCGCTCCATTTCATC       | AGGTCCCTCACCGCACA        |
| Cs4g14850       | TTGCGTAGCCGTCAAAGAA    | CCACAACCAATCACCACCA      |
| Cs9g19270       | TAATCAACGCAGTTCCAGC    | CAAACACCGTAATGCCAAGT     |
| Cs5g34270       | CGAGCGAGGTGATAAGATTG   | AGCCAGATGGGTTGGAGTT      |
| Cs5g07700       | GAGGGAAATCATCAACCACA   | AGTTCACCACCAGCAGCAT      |
| Cs8g19140       | CGGGAGGGAGGGTAATC      | CACAGACCGTCCGTTGC        |
| Cs4g14980       | GGCAAAGTCATACAGTGGAACG | CAAACCATCGCTGGCTAA       |
| Cs5g03060       | ATCACGGCTTGCCAGAG      | GGTTGCTCCACCACTCA        |
| Cs5g20590       | GGGGTGTTTGTTTCAGGT     | TTGCCATCAAGTCTATTCC      |
| Cs9g08850       | GAAACCCAGAAAGTGAGCG    | CACAGGACAATGAAGGCAAT     |
| orange1.1t02185 | TTGTTCCGGCACTAAACTCGG  | CCTTTGTGGTGGCGGTATT      |
| orange1.1t00464 | TCCTACGCCTTTAGAAACAGAG | CAGTTCAGCATT CAGACCC     |
| Cs1g17220       | CGGGAAAGTGTTCTCT       | GCTATTGGCACCGTCTG        |

|                 |                           |                         |
|-----------------|---------------------------|-------------------------|
| Cs4g06520       | CGTCAACAACAACCACCAC       | GCCTTCGGCTTCACTTC       |
| Cs7g02820       | GATTTCTTCGGCTTGGA         | CGTAATCGGCTCTTCTTT      |
| Cs4g07130       | ATGGCGGACAAGTGATT         | CATAGGAGGATAAGCGGTA     |
| Cs1g17210       | CGCCTCCAATGTGATGAA        | ACTTGGTATGGTGCTCTTGC    |
| orange1.1t01021 | AATCAAGTGGTGGTGCTG        | CTTCCATTTGCGGGTTT       |
| Cs5g01450       | AGGAAGAAAGCCAACAAGCG      | ATGTAGGCAACAGCATCAGC    |
| orange1.1t03769 | AGAAATGGGCGAAGAAG         | TGTAGTCGTGGACCGTAGAT    |
| orange1.1t04376 | GCCAAATGGTCCTGTCA         | TTCAATCCGTCTGGTGTT      |
| Cs1g17380       | TACCCGTATGGTGGTTATG       | ATGTATTTGGTCGCTTGTAG    |
| Cs3g24230       | AAACGGCGGCAAAGTGA         | ATTGTAACGCTACGGGTGG     |
| orange1.1t03727 | GTAGATTGGTCACCTCCTCGTC    | TAGGCTTCCGCCGTATTGA     |
| Cs4g15220       | CAGAAGATGGTGCTGATTTGG     | TCAGGAAAGGATAGTCCGTGTA  |
| Cs5g17880       | GGGCAGATAGGGTTGGGATA      | ATGGGCAGCAAACGTGTGAGG   |
| ACTB            | CCAATTCTCTCTTGAACCTGTCCTT | TGACTGATGAGAACTGCCAGAAG |
